# Supplementary material for: Insights into the control of magnetic coupling in the Mn4III complex: from ferromagnetic to antiferromagnetic
Source: Royal Society of Chemistry journal article supplement (doi:10.1039/c0dt00382d), 2010-01-01
Supplement: c0dt00382d.pdf [file c0dt00382d.pdf]

**Table S1** The spin densities on the Mn(III) centers and ligand atoms of model A'

| Bridging<br>angles | Mn1   | Mn2   | O1    | O2    | O3     | O4    | O5    | O6    | N1    | N2    | N3    | N4    |
|--------------------|-------|-------|-------|-------|--------|-------|-------|-------|-------|-------|-------|-------|
| 91                 | 3.849 | 3.848 | 0.012 | 0.011 | 0.009  | 0.101 | 0.004 | 0.101 | 0.015 | 0.053 | 0.052 | 0.014 |
| 95                 | 3.838 | 3.839 | 0.019 | 0.019 | 0.009  | 0.096 | 0.009 | 0.096 | 0.017 | 0.052 | 0.052 | 0.017 |
| 99                 | 3.816 | 3.816 | 0.047 | 0.047 | -0.016 | 0.091 | 0.016 | 0.091 | 0.021 | 0.046 | 0.046 | 0.021 |
| 103                | 3.793 | 3.784 | 0.044 | 0.044 | -0.028 | 0.091 | 0.014 | 0.087 | 0.022 | 0.044 | 0.046 | 0.021 |
| 107                | 3.770 | 3.760 | 0.041 | 0.041 | -0.032 | 0.087 | 0.017 | 0.083 | 0.024 | 0.041 | 0.044 | 0.023 |
| 111                | 3.746 | 3.746 | 0.037 | 0.036 | -0.027 | 0.079 | 0.027 | 0.080 | 0.026 | 0.037 | 0.037 | 0.026 |
| 115                | 3.719 | 3.719 | 0.033 | 0.033 | -0.030 | 0.077 | 0.030 | 0.077 | 0.026 | 0.034 | 0.034 | 0.026 |
| 119                | 3.695 | 3.695 | 0.030 | 0.030 | -0.033 | 0.075 | 0.033 | 0.075 | 0.026 | 0.031 | 0.031 | 0.026 |

**Table S2** The spin densities on the Mn(III) centers and ligand atoms of model B'

| Bridging<br>angles | Mn1'  | Mn2'  | O1'   | O2'   | O3'   | O4'   | N1'   | N2'   | N3'   | N4'   | N5'   | N6'   |
|--------------------|-------|-------|-------|-------|-------|-------|-------|-------|-------|-------|-------|-------|
| 91                 | 3.923 | 3.853 | 0.048 | 0.140 | 0.042 | 0.056 | 0.043 | 0.032 | 0.025 | 0.034 | 0.031 | 0.007 |
| 95                 | 3.887 | 3.843 | 0.012 | 0.149 | 0.040 | 0.060 | 0.042 | 0.031 | 0.029 | 0.037 | 0.031 | 0.012 |
| 99                 | 3.820 | 3.802 | 0.005 | 0.092 | 0.034 | 0.108 | 0.042 | 0.029 | 0.032 | 0.039 | 0.030 | 0.021 |
| 103                | 3.801 | 3.768 | 0.011 | 0.098 | 0.033 | 0.102 | 0.038 | 0.028 | 0.036 | 0.036 | 0.029 | 0.025 |
| 107                | 3.777 | 3.733 | 0.014 | 0.103 | 0.031 | 0.097 | 0.034 | 0.026 | 0.040 | 0.033 | 0.027 | 0.030 |
| 111                | 3.746 | 3.692 | 0.017 | 0.109 | 0.028 | 0.092 | 0.029 | 0.025 | 0.045 | 0.029 | 0.026 | 0.034 |
| 115                | 3.718 | 3.658 | 0.018 | 0.112 | 0.026 | 0.087 | 0.025 | 0.023 | 0.048 | 0.025 | 0.024 | 0.037 |
| 119                | 3.684 | 3.620 | 0.018 | 0.114 | 0.024 | 0.081 | 0.020 | 0.020 | 0.052 | 0.020 | 0.022 | 0.040 |
